# Supplementary material for: Systemic proteasome inhibition triggers neurodegeneration in a transgenic mouse model expressing human α-synuclein under oligodendrocyte promoter: implications for multiple system atrophy
Source: PubMed Central journal article supplement (PMC3377902; doi:10.1007/s00401-012-0977-5), 2012-04-11
Supplement: 401_2012_977_MOESM1_ESM.pdf [file 401_2012_977_MOESM1_ESM.pdf]

a

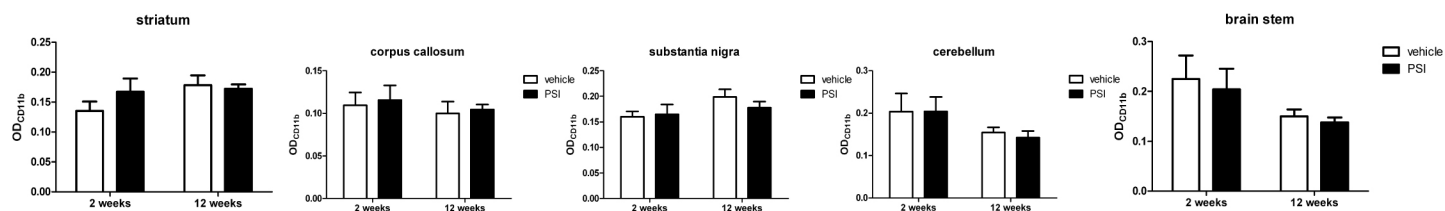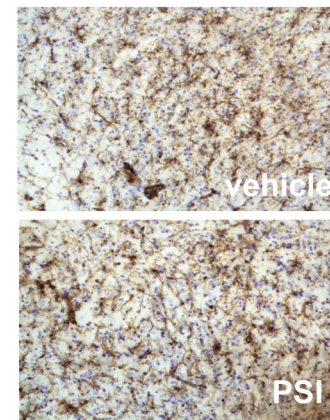

b

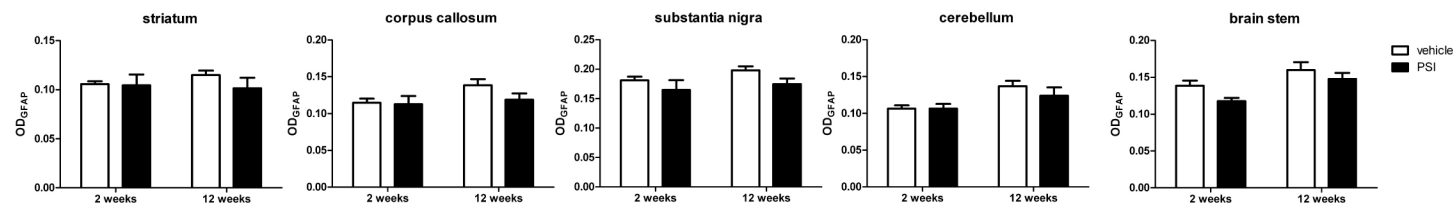

GFAP

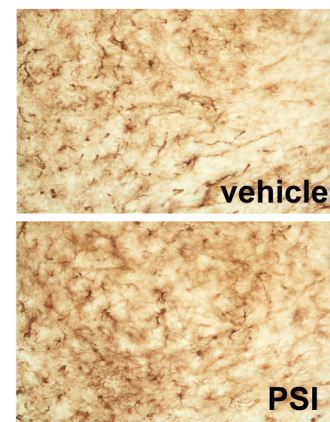

**Supplementary Fig. S1. No changes of gliosis were detected in the degenerating regions of PLP-h $\alpha$ SYN transgenic mice upon PSI treatment. (a)** Microgliosis was assessed by determining the OD<sub>CD11b</sub> in the striatum, corpus callosum, substantia nigra, cerebellum and brain stem of vehicle and PSI treated transgenic mice, 2 and 12 weeks after treatment. The photomicrographs in the right panel demonstrate CD11b-positive activated microglia profiles in the cerebellum of both vehicle- and PSI-treated PLP-h $\alpha$ SYN transgenic mice. **(b)** Astroglial profiles were assessed by determining the OD<sub>GFAP</sub> in the striatum, corpus callosum, substantia nigra, cerebellum and brain stem of vehicle and PSI treated transgenic mice, 2 and 12 weeks after treatment. The photomicrographs in the right panel demonstrate GFAP-positive astroglial profiles in the substantia nigra of both vehicle and PSI treated PLP-h $\alpha$ SYN transgenic mice. Data are presented as mean  $\pm$  s.e.m. In all groups n=6. Data were analyzed by two-way ANOVA with post hoc Bonferroni's test. No significant differences between the groups were observed.
