# Supplementary material for: Systemic proteasome inhibition triggers neurodegeneration in a transgenic mouse model expressing human α-synuclein under oligodendrocyte promoter: implications for multiple system atrophy
Source: Springer Nature journal article supplement (doi:10.1007/s00401-012-0977-5), 2012-04-10
Supplement: MOESM2 [file 8403880]

**Supplementary Table S1.** Stride length analysis.

| Stride length (cm)       | 2 weeks after treatment |                        |                                           | 12 weeks after treatment |                       |                                           |
|--------------------------|-------------------------|------------------------|-------------------------------------------|--------------------------|-----------------------|-------------------------------------------|
|                          | Vehicle                 | PSI                    | Effect of treatment (Bonferroni post hoc) | Vehicle                  | PSI                   | Effect of treatment (Bonferroni post hoc) |
| <b>tg left hindlimb</b>  | 5.185±0.23***<br>(n=6)  | 4.907±0.23***<br>(n=6) | t=0.69,<br>p>0.05                         | 4.768±0.29***<br>(n=6)   | 4.906±0.37<br>(n=6)   | t=0.34,<br>p>0.05                         |
| <b>tg right hindlimb</b> | 5.145±0.18**<br>(n=6)   | 4.825±0.22***<br>(n=6) | t=0.87,<br>p>0.05                         | 4.596±0.26**<br>(n=6)    | 4.890±0.35**<br>(n=6) | t=0.80,<br>p>0.05                         |
| <b>wt left hindlimb</b>  | 6.8±0.14<br>(n=6)       | 6.5±0.23<br>(n=6)      | t=0.98,<br>p<0.05                         | 6.5±0.06<br>(n=3)        | 6.0±0.17<br>(n=3)     | t=2.74<br>p=0.05                          |
| <b>wt right hindlimb</b> | 6.4±0.19<br>(n=6)       | 6.5±0.16<br>(n=6)      | t=0.61,<br>p<0.05                         | 6.3±0.06<br>(n=3)        | 6.1±0.13<br>(n=3)     | t=0.50,<br>p<0.05                         |

tg, transgenic; wt, wild type; Comparison of the respective stride length of wt and tg mice with the same type of treatment, \*\*p<0.01; \*\*\*p<0.001.

**Supplementary Table S2.** Specific effects of systemic proteasome inhibition in wild type versus PLP-haSYN transgenic mice.

| <b>Mouse strain</b> | <b>Motor disability induced by PSI but not vehicle</b> | <b>Neuronal loss induced by PSI but not vehicle</b> | <b>Lewy body-like aggregates in neurons induced by PSI but not vehicle</b> | <b>Oligodendroglial dysfunction / myelin disruption induced by PSI but not vehicle</b> | <b>Reduced brain proteasome activity</b> | <b>References</b>           |
|---------------------|--------------------------------------------------------|-----------------------------------------------------|----------------------------------------------------------------------------|----------------------------------------------------------------------------------------|------------------------------------------|-----------------------------|
| <i>C57BL/6</i>      | -                                                      | -                                                   | -                                                                          | -                                                                                      | -                                        | [4;13;19] and current study |
| <i>PLP-haSYN</i>    | +                                                      | +                                                   | -                                                                          | +                                                                                      | +                                        | current study               |

**Supplementary Table S3.** Relevance of the PSI-induced PLP-haSYN transgenic mouse model to the human MSA pathology.

| <b>Human MSA Pathology</b>                                                                                                                                                                                               | <b><i>PLP-haSYN</i></b>                                                                                                                                                                           | <b><i>PLP-haSYN+PSI</i></b>                                                                                                                                                                                              |
|--------------------------------------------------------------------------------------------------------------------------------------------------------------------------------------------------------------------------|---------------------------------------------------------------------------------------------------------------------------------------------------------------------------------------------------|--------------------------------------------------------------------------------------------------------------------------------------------------------------------------------------------------------------------------|
| <p>GCI</p> <ul style="list-style-type: none"> <li>• Hyperphosphorylated insoluble <math>\alpha</math>SYN</li> <li>• <math>\alpha</math>SYN fibril aggregates in oligodendroglia</li> <li>• Polyubiquitination</li> </ul> | <p>GCI</p> <ul style="list-style-type: none"> <li>• Hyperphosphorylated insoluble <math>\alpha</math>SYN</li> <li>• <math>\alpha</math>SYN non-fibrillar aggregates in oligodendroglia</li> </ul> | <p>GCI</p> <ul style="list-style-type: none"> <li>• Hyperphosphorylated insoluble <math>\alpha</math>SYN</li> <li>• <math>\alpha</math>SYN fibril aggregates in oligodendroglia</li> <li>• Polyubiquitination</li> </ul> |
| Neuronal $\alpha$ SYN inclusions (cytoplasmic/nuclear)                                                                                                                                                                   | -                                                                                                                                                                                                 | -                                                                                                                                                                                                                        |
| Striatonigral degeneration                                                                                                                                                                                               | Nigral degeneration                                                                                                                                                                               | Striatonigral degeneration                                                                                                                                                                                               |
| Olivopontocerebellar atrophy                                                                                                                                                                                             | -                                                                                                                                                                                                 | Olivopontocerebellar atrophy                                                                                                                                                                                             |
| Microglial activation                                                                                                                                                                                                    | Microglial activation accompanying GCI pathology                                                                                                                                                  | Microglial activation accompanying GCI pathology, but not accelerated by PSI treatment                                                                                                                                   |
| Astrogliosis                                                                                                                                                                                                             | -                                                                                                                                                                                                 | -                                                                                                                                                                                                                        |
